# Supplementary material for: IL2RA is associated with persistence of rheumatoid arthritis
Source: PubMed Central journal article supplement (PMC4563834; doi:10.1186/s13075-015-0739-6), 2015-09-08
Supplement: 13075_2015_739_MOESM2_ESM.pdf [file 13075_2015_739_MOESM2_ESM.pdf]

**Additional file 2. Genetic variants in relation to achieving DMARD-free remission in ACPA-positive and ACPA-negative rheumatoid arthritis patients from the Leiden EAC**

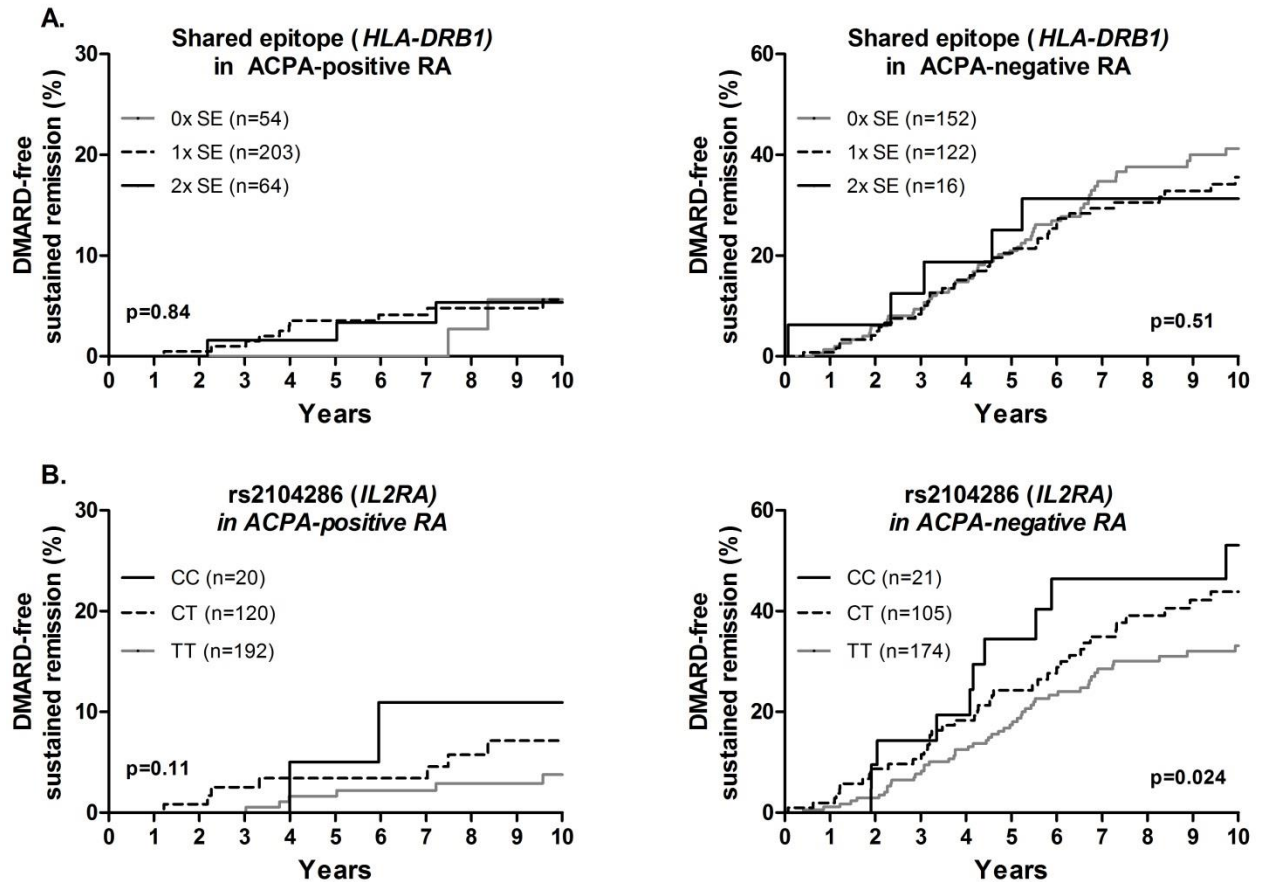

Shared epitope (SE) in ACPA-positive: hazard ratio (HR) per SE-allele is 0.92 (95% confidence interval (95%CI)=0.42-2.03). SE in ACPA-negative: HR per SE-allele is 0.89 (95%CI=0.63-1.25). Rs2104286 (*IL2RA*) in ACPA-positive: HR per minor allele is 1.82 (95%CI=0.88-3.77). Rs2104286 (*IL2RA*) in ACPA-negative: HR per minor allele is 1.41 (95%CI=1.05-1.89). All The analyses were adjusted for age, gender and inclusion period (as proxy for treatment strategy). Note that the y-axes of the ACPA-positive and ACPA-negative sub groups are different.
